# Supplementary material for: Agricultural Holdings and Slaughterhouses’ Impact on Patterns of Pathological Findings Observed during Post-Mortem Meat Inspection
Source: MDPI journal article supplement (doi:10.3390/ani11051442), 2021-05-18

Supplementary Figure S1. Distribution of the number of agriculture holdings per slaughterhouse

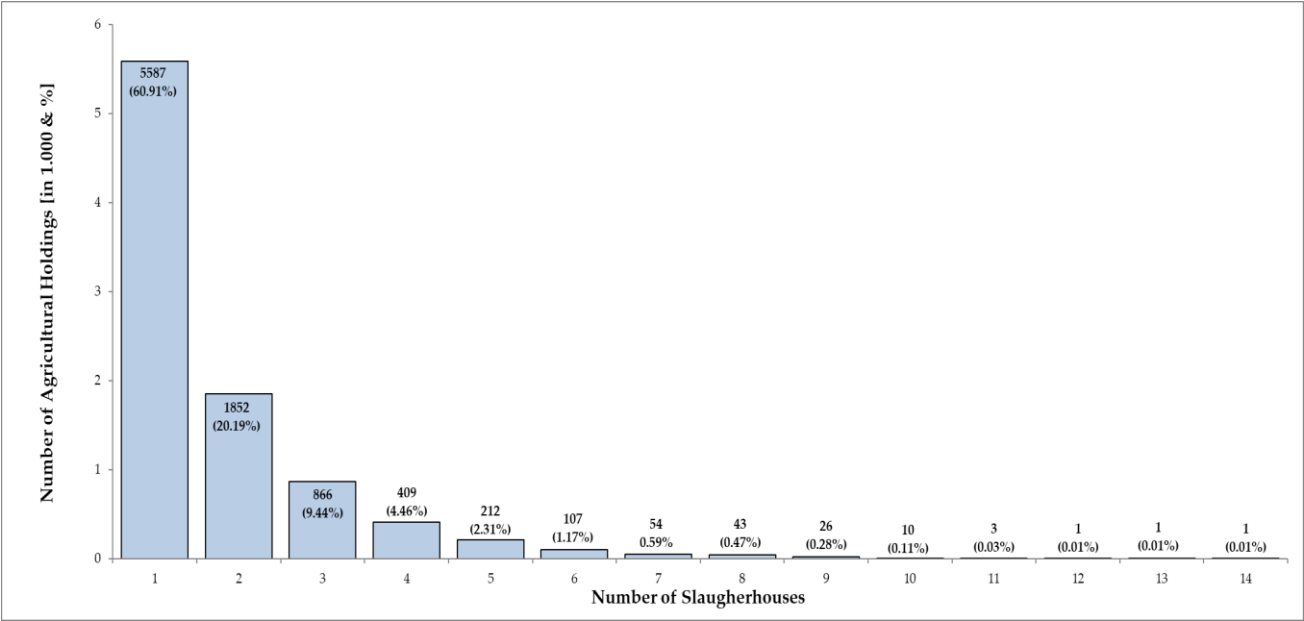

Supplement: s1 [file s1]
